# Supplementary material
Source: publisher figshare collection journal article supplement (https://geolsoc.figshare.com/ndownloader/files/12296786)
Supplement: Supplementary file 1 [file 12296786]

## Sheet: spinel
Table 4. Representative microprobe analyses of chromite in the Aladag peridotites and chromitites
Lithology	Analysis No.	SiO2	TiO2	Al2O3	Cr2O3	FeO	MnO	MgO	CaO	Na2O	K2O	NiO	Total	Mg#	Cr#	Fe3+#
Harzburgite	3-3-6	0.04	0.028	19.614	48.994	17.687	0.313	12.952	b.d.	0.017	b.d.	0.109	99.757	60.4628	62.6171	3.41744
	3-3-15	0.042	0	20.7	48.767	19.581	0.312	11.163	b.d.	0.037	b.d.	0.028	100.634	52.1223	61.2372	1.71587
	3-4-1	0.018	0.042	18.639	49.95	18.567	0.361	11.962	b.d.	b.d.	b.d.	0.043	99.582	56.487	64.2479	2.85816
	3-4-2	0.044	0.038	19.237	48.973	18.43	0.287	12.514	b.d.	b.d.	b.d.	0.09	99.614	58.6489	63.0603	3.58791
	3-5-3	0.07	0.065	19.285	49.53	18.409	0.34	11.941	b.d.	0.029	b.d.	0.06	99.729	56.1988	63.2655	2.42024
	3-5-4	0.07	0.036	20.289	48.896	18.562	0.293	11.788	b.d.	0.027	b.d.	0.036	99.997	55.1368	61.7745	1.936
	3-6-3	0.02	0.028	17.074	51.317	19.423	0.353	11.582	b.d.	b.d.	b.d.	0.02	99.817	55.0201	66.8373	3.42303
	3-6-5	0.011	0.069	16.511	51.227	20.257	0.382	11.01	b.d.	b.d.	b.d.	0.019	99.487	52.7519	67.5378	3.64089
	3-7-8	0.058	0.022	20.173	48.329	18.572	0.341	11.818	b.d.	0.023	0.005	0.025	99.366	55.6404	61.6344	2.36159
	3-7-11	0.012	0.046	18.254	50.599	18.335	0.323	12.16	b.d.	b.d.	b.d.	0.111	99.84	57.3394	65.02	2.94187
	3-8-3	0.017	0.033	19.273	49.955	18.791	0.313	11.955	b.d.	0.027	b.d.	0.101	100.465	55.9349	63.4783	2.64556
	3-8-5	0.045	0.036	18.726	49.423	20.151	0.361	11.618	b.d.	0.024	b.d.	0.108	100.492	54.6082	63.8965	3.90501
Mantle dunite	3-9-1	0.013	0.13	21.153	43.986	21.627	0.383	11.596	b.d.	b.d.	0.013	0.168	99.073	54.4712	58.2358	5.83047
	3-9-5	0.009	0.067	21.266	44.471	20.667	0.359	12.134	b.d.	0.011	0.011	0.112	99.107	56.7407	58.3729	5.5621
	3-10-1	0.027	0.142	20.36	45.349	20.532	0.35	12.548	b.d.	b.d.	b.d.	0.064	99.376	58.362	59.8973	6.102
	3-10-3	0.02	0.119	20.985	45.67	20.352	0.298	12.587	b.d.	0.028	0.007	0.057	100.123	58.0255	59.3392	5.43837
	3-10-5	0.01	0.071	20.448	45.388	20.54	0.276	12.865	b.d.	0.007	b.d.	0.064	99.669	59.4768	59.8143	6.52013
MTZ chromitite	1-3-1	0.019	0.175	11.027	56.625	17.521	0.313	13.796	0.005	0.035	0.006	0.128	99.65	65.9221	77.495	6.617
	1-3-3	b.d.	0.179	11.109	56.948	18.32	0.353	12.174	b.d.	b.d.	b.d.	0.055	99.138	59.1507	77.465	4.63521
	1-3-5	0.054	0.217	10.904	56.972	18.991	0.34	11.684	b.d.	b.d.	b.d.	0.065	99.228	56.9441	77.7957	4.53123
	2-6-3	0.018	0.194	10.153	57.481	21.452	0.362	10.787	b.d.	b.d.	b.d.	0.088	100.539	52.4567	79.1511	5.62043
	2-6-5	0.036	0.235	10.537	55.948	21.403	0.372	11.294	b.d.	0.021	b.d.	0.1	99.946	54.8254	78.0726	6.75005
	2-6-7	0.039	0.224	11.043	56.178	21.17	0.352	11.121	b.d.	b.d.	0.013	0.009	100.149	53.7758	77.3311	5.75889
	13-7-1	0.039	0.214	11.53	55.494	22.186	0.33	10.104	0.034	b.d.	0.017	0.036	99.988	49.254	76.3451	5.0868
	13-7-8	0.018	0.158	10.988	56.714	21.407	0.423	10.354	b.d.	b.d.	b.d.	0.063	100.128	50.6608	77.5841	4.79421
	13-7-11	0.053	0.157	10.917	56.777	21.023	0.363	10.795	b.d.	0.007	0.007	0.037	100.136	52.548	77.7158	5.08445
Mantle chromitite	15-11-1	b.d.	0.139	11.671	58.91	14.101	0.323	14.744	b.d.	0.01	b.d.	0.103	100.001	69.8791	77.1936	3.73934
	15-11-4	b.d.	0.113	11.347	58.319	14.314	0.313	14.691	b.d.	b.d.	b.d.	0.155	99.254	70.2604	77.5102	4.39446
	15-11-8	0.013	0.105	11.751	59.01	14.039	0.301	14.636	b.d.	b.d.	b.d.	0.108	99.963	69.4635	77.1031	3.46425
	15-15-1	0.031	0.196	11.265	58.534	16.071	0.314	13.89	b.d.	0.007	b.d.	0.104	100.412	65.9455	77.7002	4.46274
	15-15-4	0.013	0.141	11.299	58.37	14.54	0.298	14.496	b.d.	0.023	b.d.	0.124	99.304	69.3076	77.5992	4.22141
	15-15-8	0.017	0.161	11.153	56.138	16.547	0.274	14.784	b.d.	b.d.	0.012	0.085	99.171	70.1844	77.1443	7.3498
